# Supplementary material for: The magnetoresistance effect in a conducting molecular crystal consisting of dicyano(phthalocyaninato)manganese(iii)
Source: Royal Society of Chemistry journal article supplement (doi:10.1039/c6dt04481f), 2017-01-01
Supplement: c6dt04481f1.pdf [file c6dt04481f1.pdf]

Electronic Supplementary Materials (ESI) for Dalton Transactions

Supporting Information

## **Magnetoresistance effect in a conducting molecular crystal consisting of dicyano(phthalocyaninato)manganese(III)**

Masaki Matsuda,<sup>\*a‡</sup> Gosuke Yoshida,<sup>a‡‡</sup> Jun-ichi Yamaura,<sup>a§</sup> Tamotsu Inabe,<sup>b</sup> and Hiroyuki Tajima<sup>a§§</sup>.

<sup>a</sup> Institute for Solid State Physics, the University of Tokyo, 5-1-5 Kashiwanoha Kashiwa 277-8581, Japan.

<sup>b</sup> Department of Chemistry, Hokkaido University, Kita 10 Nishi 8, Kita-ku, Sapporo 060-0810, Japan.

Present address:

<sup>‡</sup>Department of Chemistry, Kumamoto University, 2-39-1 Kurokami, Chuo-ku, Kumamoto 860-8555, Japan. E-mail: masaki@sci.kumamoto-u.ac.jp

<sup>‡‡</sup>Asahi Glass Co. Ltd., Tokyo 100-8405, Japan.

<sup>§</sup>Material Research Center for Element Strategy, Tokyo Institute for Technology, Yokohama 226-8503, Japan.

<sup>§§</sup>Graduate School of Material Science, University of Hyogo, 3-2-1 Kohto, Hyogo 678-1297, Japan.

Contents

|                                                                                                        |    |
|--------------------------------------------------------------------------------------------------------|----|
| Crystallographic details and Table S1:                                                                 | S2 |
| Magnetisation curve for TPP[Mn <sup>III</sup> (Pc)(CN) <sub>2</sub> ] <sub>2</sub> at 2 K (Figure S1): | S4 |

## Crystallographic details

Crystal data and structure refinement are summarised as Table S1. One may notice that Goodness of fit is rather low. This often implies a twinning in crystal. In the case of non-merohedral twin, some reflections overlap the reflections from the second twin domain, giving rise to refinement parameters degraded. However, in the present measurement, we did not observe the second domain by using CCD area detector, which can easily find out the second domain if it presents. Whereas, in the case of merohedral twin, there is no possible "true" space group against the present  $P4_2/n$  based on the list of International Tables C, Table 1.3.4.2 in the section of Twinning. In consequence, we conclude that the low Goodness of fit value is not related to the twinning.

We provide another possibility that we can see large temperature factors on Tetraphenylphosphonium. This implies that the cation has a rotational disorder. We consider the origin of the small goodness of fit might be come from the disorder, which has no influence on the discussion on the overlap integral between Pc rings.

**Table S1.** Crystal data and structure refinement for TPP[Mn<sup>III</sup>(Pc)(CN)<sub>2</sub>]<sub>2</sub>.

|                                                       |                                                                                         |
|-------------------------------------------------------|-----------------------------------------------------------------------------------------|
| Crystal data                                          |                                                                                         |
| CCDC number                                           | 1517719                                                                                 |
| Chemical formula                                      | 2(C <sub>34</sub> H <sub>16</sub> MnN <sub>10</sub> )·C <sub>24</sub> H <sub>20</sub> P |
| Formula weight                                        | 1578.29                                                                                 |
| Crystal description                                   | Black needle                                                                            |
| Crystal size (mm <sup>3</sup> )                       | 0.39 × 0.08 × 0.07                                                                      |
| <i>T</i> (K)                                          | 293                                                                                     |
| Crystal system, space group                           | Tetragonal, $P4_2/n$ (No. 2)                                                            |
| <i>a</i> (Å)                                          | 21.7113 (11)                                                                            |
| <i>c</i> (Å)                                          | 7.4439 (5)                                                                              |
| <i>V</i> (Å <sup>3</sup> )                            | 3508.9 (3)                                                                              |
| <i>Z</i>                                              | 2                                                                                       |
| <i>d</i> <sub>cal</sub> (g cm <sup>-3</sup> )         | 1.494                                                                                   |
| Radiation                                             | MoKα                                                                                    |
| Wavelength (Å)                                        | 0.71069                                                                                 |
| $\mu$ (mm <sup>-1</sup> )                             | 0.45                                                                                    |
| Max. and min. transmission                            | 0.971, 0.898                                                                            |
| $\theta$ range for data collection                    | 1.33° ≤ $\theta$ ≤ 28.50°                                                               |
| Index ranges                                          | 0 ≤ <i>h</i> ≤ 29, 0 ≤ <i>k</i> ≤ 29, 0 ≤ <i>l</i> ≤ 9,                                 |
| No. of measured, independent and observed reflections | 4372, 4372, 2390 ( <i>I</i> > 2σ( <i>I</i> ))                                           |

**Table S1.** Crystal data and structure refinement for TPP[Mn<sup>III</sup>(Pc)(CN)<sub>2</sub>]<sub>2</sub>. (Continued)

---

|                                                         |                                    |
|---------------------------------------------------------|------------------------------------|
| Refinement method                                       | Full-matrix least-squares on $F^2$ |
| $R$ (all data)                                          | $R_1 = 0.0848$ , $wR_2 = 0.0776$   |
| Goodness-of-fit                                         | 0.702                              |
| No. of reflections/parameters                           | 4372/393                           |
| Largest difference peak and hole (e $\text{\AA}^{-3}$ ) | 0.50 and $-0.62$                   |

---

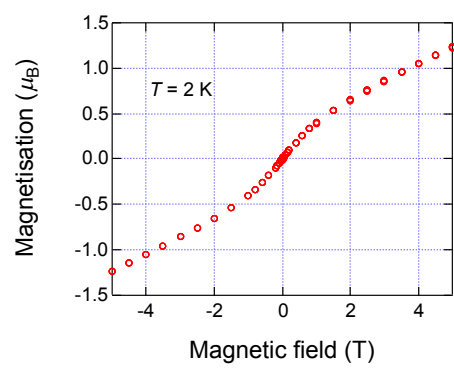

**Figure S1.** Magnetisation curve for  $\text{TPP}[\text{Mn}^{\text{III}}(\text{Pc})(\text{CN})_2]_2$  at 2 K.
